# Supplementary material for: Synthetic Seismic Reflection Modelling in a Supercritical Geothermal System: An Image of the K-Horizon in the Larderello Field (Italy)
Source: Hindawi journal article supplement (doi:10.1155/2019/8492453), 2019-03-28
Supplement: f1 [file 8492453.f1.pdf]

Supplementary material

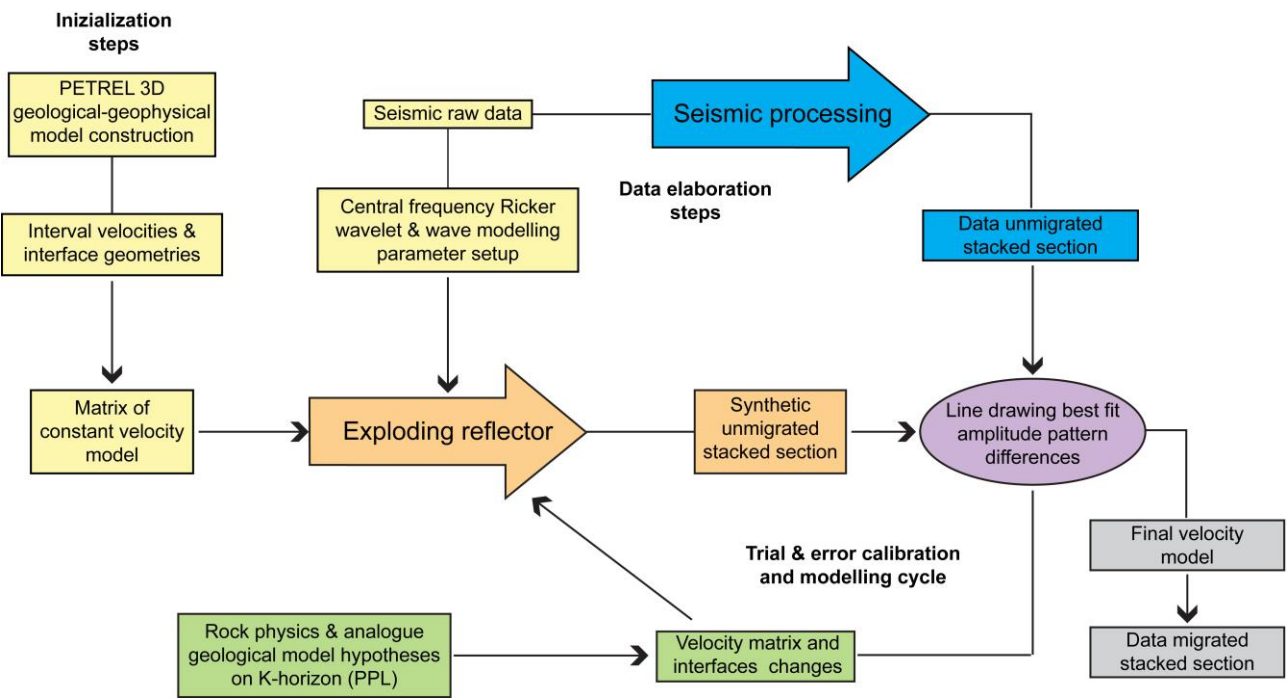

Figure S1

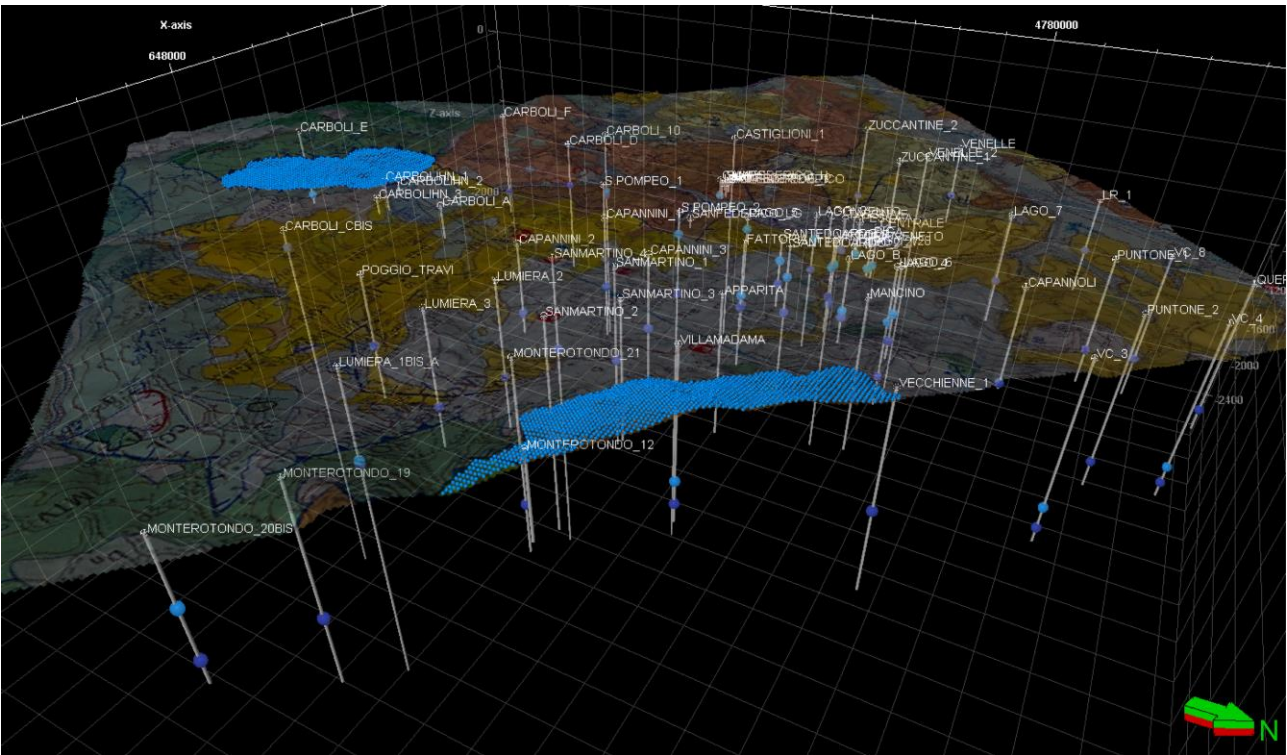

Figure S2

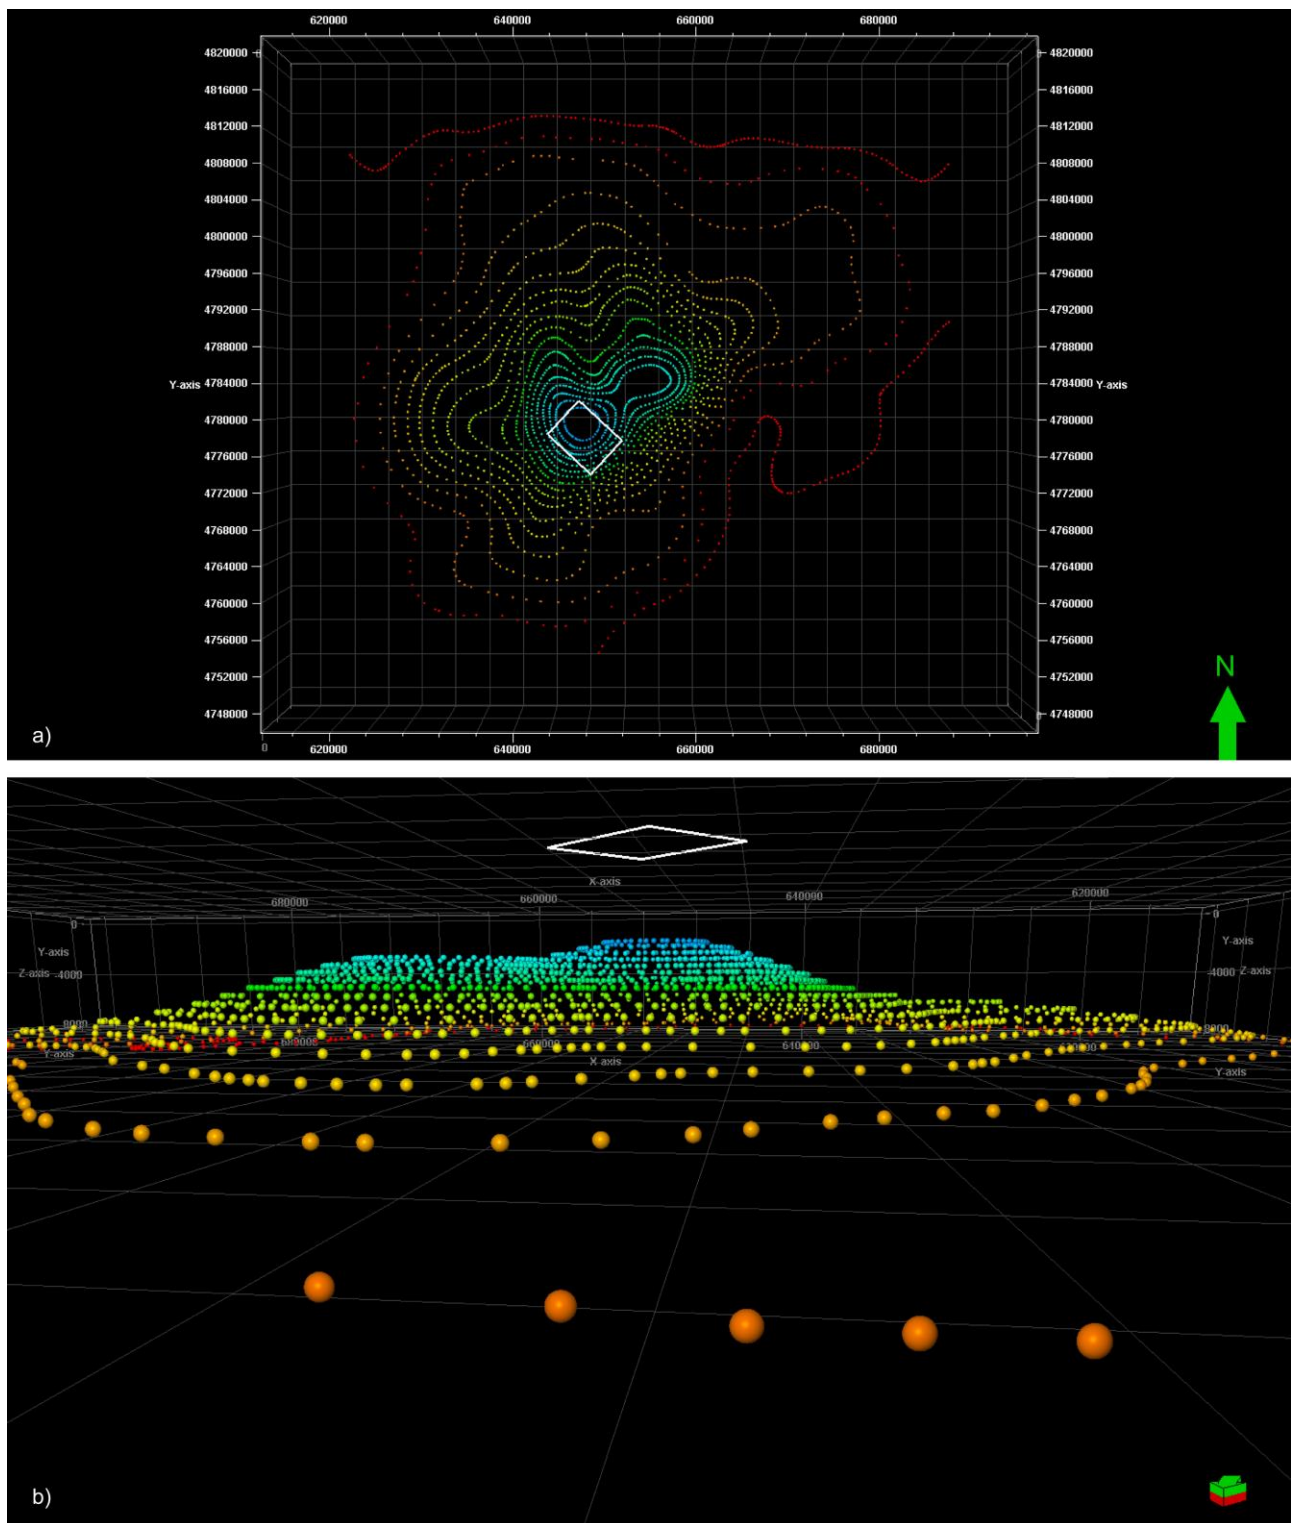

Figure S3

**Table S1:** Deep geothermal wells used to calibrate geological surfaces [64-65-66-67]. The original well head coordinates have been converted into our geographical system (i.e., WGS84-UTM32N; EPSG code: 32632). No information regarding deviation survey are available. All the wells have been considered vertical.

| Well Name          | Northing<br>WGS84UTM32N | Easting<br>WGS84UTM32N | Well head<br>(m a.s.l.) | Bottom hole<br>(m in MD) |
|--------------------|-------------------------|------------------------|-------------------------|--------------------------|
| APPARITA           | 4779042                 | 648601                 | 300                     | 955                      |
| CAMPO              | 4778296                 | 646951                 | 193                     | 143                      |
| CAPANNINI_1        | 4777949                 | 647992                 | 255                     | 880                      |
| CAPANNINI_2        | 4777620                 | 648496                 | 220                     | 645                      |
| CAPANNINI_3        | 4778418                 | 648275                 | 240                     | 1180                     |
| CAPANNOLI          | 4780470                 | 647582                 | 215                     | 709                      |
| CARBOLI_10         | 4777083                 | 646496                 | 170                     | 1858                     |
| CARBOLI_A          | 4776844                 | 648271                 | 214                     | 240                      |
| CARBOLI_C          | 4776275                 | 649097                 | 255                     | 1017                     |
| CARBOLI_CBIS       | 4776275                 | 649091                 | 255                     | 2907                     |
| CARBOLI_D          | 4776936                 | 646816                 | 172                     | 1080                     |
| CARBOLI_E          | 4775420                 | 648069                 | 415                     | 562                      |
| CARBOLI_F          | 4776286                 | 646762                 | 268                     | 832                      |
| CARBOLIHN_1        | 4776318                 | 648214                 | 261                     | 219                      |
| CARBOLIHN_2        | 4776441                 | 648212                 | 255                     | 78                       |
| CARBOLIHN_3        | 4776446                 | 648438                 | 250                     | 114                      |
| CASTIGLIONI_1      | 4778128                 | 646315                 | 265                     | 1766                     |
| CENTRALE           | 4779505                 | 647196                 | 203                     | 366                      |
| CONVENTO           | 4779197                 | 647203                 | 216                     | 216                      |
| DIGA               | 4779508                 | 647331                 | 198                     | 278                      |
| FATTORIA_1         | 4778872                 | 647888                 | 245                     | 891                      |
| LAGO_127           | 4779451                 | 647513                 | 200                     | 10                       |
| LAGO_128           | 4779511                 | 647467                 | 200                     | 10                       |
| LAGO_3             | 4779105                 | 647227                 | 212                     | 1024                     |
| LAGO_4             | 4779763                 | 647687                 | 215                     | 1009                     |
| LAGO_5             | 4778708                 | 647433                 | 200                     | 870                      |
| LAGO_6             | 4779795                 | 647732                 | 250                     | 651                      |
| LAGO_7             | 4780235                 | 646683                 | 235                     | 797                      |
| LAGO_8             | 4779326                 | 647471                 | 200                     | 1659                     |
| LAGO_B             | 4779486                 | 647739                 | 220                     | 591                      |
| LAGOSANFEDERICO    | 4778328                 | 646995                 | 190                     | 115                      |
| LR_1               | 4780714                 | 646018                 | 185                     | 708                      |
| LUMIERA_1          | 4777717                 | 650121                 | 320                     | 1000                     |
| LUMIERA_1BIS_A     | 4777717                 | 650121                 | 320                     | 2287                     |
| LUMIERA_2          | 4777848                 | 649034                 | 286                     | 1046                     |
| LUMIERA_3          | 4777735                 | 649511                 | 325                     | 935                      |
| MANCINO            | 4779744                 | 648253                 | 290                     | 1059                     |
| MONTEROTONDO_12    | 4779021                 | 650438                 | 545                     | 497                      |
| MONTEROTONDO_19    | 4778229                 | 650924                 | 452                     | 1243                     |
| MONTEROTONDO_20BIS | 4778054                 | 651380                 | 475                     | 842                      |
| MONTEROTONDO_21    | 4778481                 | 649766                 | 400                     | 1276                     |

|                |         |        |     |      |
|----------------|---------|--------|-----|------|
| PESCAIA        | 4779382 | 647176 | 201 | 244  |
| POGGIO_TRAVI   | 4777145 | 649343 | 289 | 863  |
| PUNTONE_1      | 4780889 | 646940 | 196 | 898  |
| PUNTONE_2      | 4781088 | 647613 | 226 | 1222 |
| QUERCIOLA_2    | 4781627 | 646856 | 180 | 1061 |
| RINALDO        | 4778359 | 646972 | 188 | 73   |
| S.POMPEO_1     | 4777628 | 647456 | 214 | 869  |
| S.POMPEO_2     | 4778279 | 647578 | 200 | 2967 |
| SANFEDERICO_1  | 4778359 | 646995 | 198 | 102  |
| SANFEDERICO_2  | 4778358 | 646949 | 189 | 83   |
| SANFEDERICO_H  | 4778327 | 646950 | 198 | 77   |
| SANFEDERICO_LG | 4778372 | 647605 | 188 | 73   |
| SANMARTINO_1   | 4778363 | 648593 | 295 | 1305 |
| SANMARTINO_2   | 4778379 | 649338 | 367 | 1498 |
| SANMARTINO_3   | 4778618 | 648972 | 351 | 964  |
| SANMARTINO_4   | 4777962 | 648624 | 265 | 2309 |
| SANTEDOARDO_1  | 4779021 | 647636 | 205 | 492  |
| SANTEDOARDO_2  | 4779116 | 647747 | 220 | 1177 |
| TASSINAIE      | 4779289 | 647201 | 215 | 226  |
| VC_3           | 4780888 | 648341 | 308 | 1235 |
| VC_4           | 4781487 | 647514 | 234 | 1221 |
| VC_8           | 4781192 | 646685 | 175 | 1040 |
| VECCHIENNE_1   | 4780135 | 649193 | 422 | 1302 |
| VENELLE        | 4779652 | 645401 | 150 | 620  |
| VILLAMADAMA    | 4779119 | 649306 | 402 | 1159 |
| VITTORIOVENETO | 4779327 | 647516 | 206 | 671  |
| ZUCCANTINE_1   | 4779394 | 646333 | 324 | 614  |
| ZUCCANTINE_2   | 4778946 | 645575 | 235 | 878  |

---
